# Supplementary material for: Insight into the effects of electronegativity on the H2 catalytic activation for CO2 hydrogenation: four transition metal cases from a DFT study
Source: Royal Society of Chemistry journal article supplement (doi:10.1039/d0cy01009j), 2020-01-01
Supplement: d0cy01009j1.pdf [file d0cy01009j1.pdf]

## Supporting information

### Insight into the effect of electronegativity on H<sub>2</sub> activation for CO<sub>2</sub> hydrogenation: Four transition metal cases from a DFT study

Haipeng Chen,<sup>\*a</sup> Minjian Yang,<sup>b</sup> Jinqiang Liu,<sup>a</sup> Guojian Lu<sup>\*c</sup> and Xun Feng<sup>\*b</sup>

<sup>a</sup> College of Chemistry and Chemical Engineering, Henan Key Laboratory of Function-Oriented Porous Materials, Luoyang Normal University, Luoyang 471934, China.

<sup>b</sup> College of Chemical Engineering, Guizhou University of Engineering Science, Bijie 551700, China.

<sup>c</sup> Lianyungang Normal College, Lianyungang 222006, China.

#### **\*Corresponding authors:**

haipengchen1985@163.com (H.P. Chen)

luguojian813@163.com (G.J. Lu)

fengx@lynu.edu.cn (X. Feng)

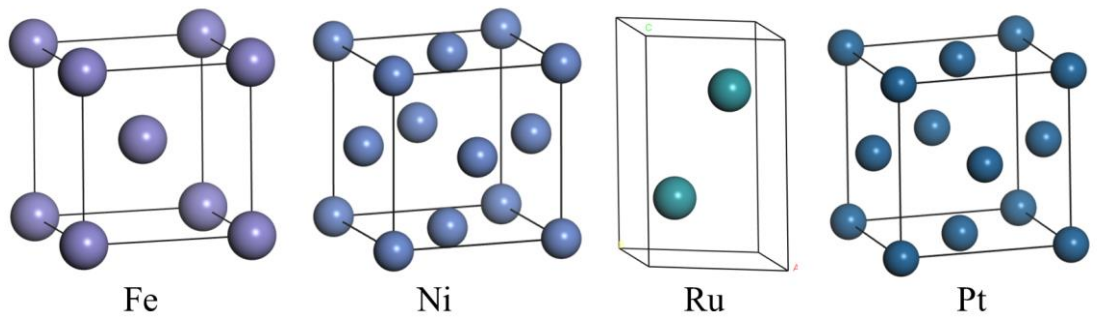

**Figure S1.** Crystal cells of Fe, Ni, Ru and Pt.

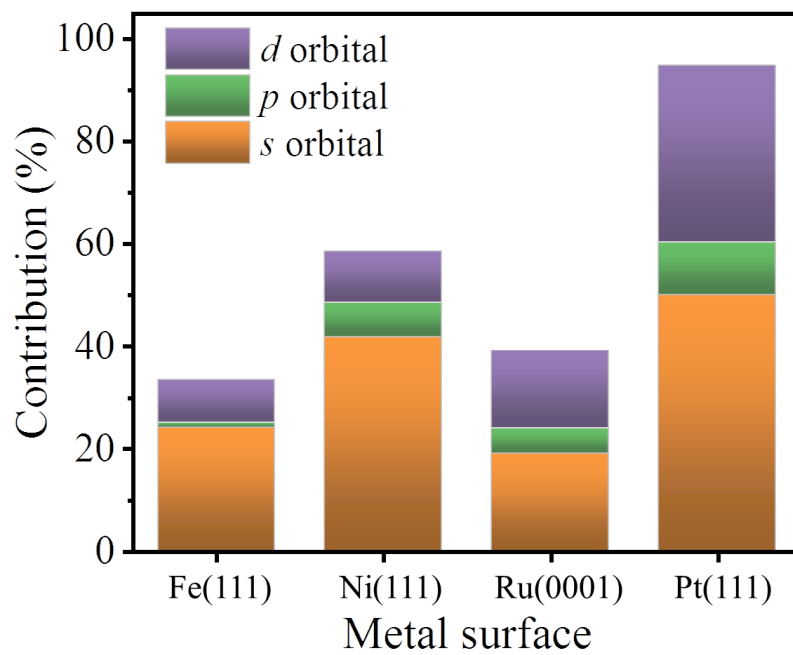

**Figure S2.** Orbital contribution for H<sub>2</sub> dissociation on Fe(111), Ni(111), Ru(0001) and Pt(111).

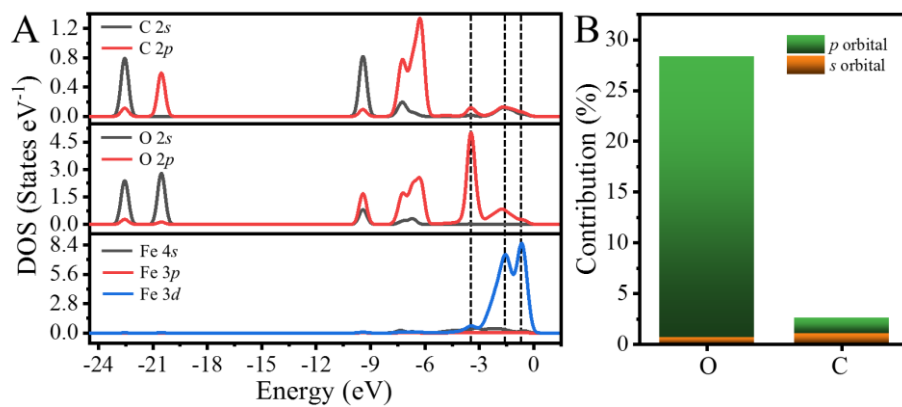

**Figure S3.** (A) Partial density of states (PDOS) for CO<sub>2</sub> adsorption on Fe(111), and (B) the corresponding orbital contribution of CO<sub>2</sub> for overlapping with Fe 3d orbital.

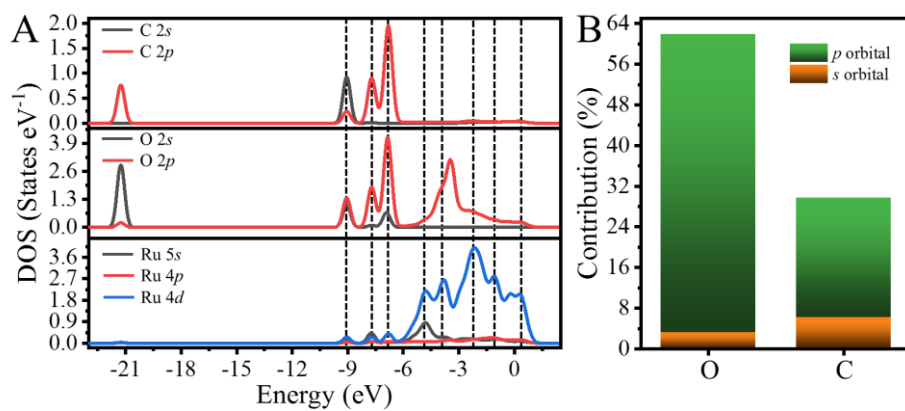

**Figure S4.** Partial density of states (PDOS) for CO<sub>2</sub> adsorption on Ru(0001), and (B) the corresponding orbital contribution of CO<sub>2</sub> for overlapping with Ru 4d orbital.

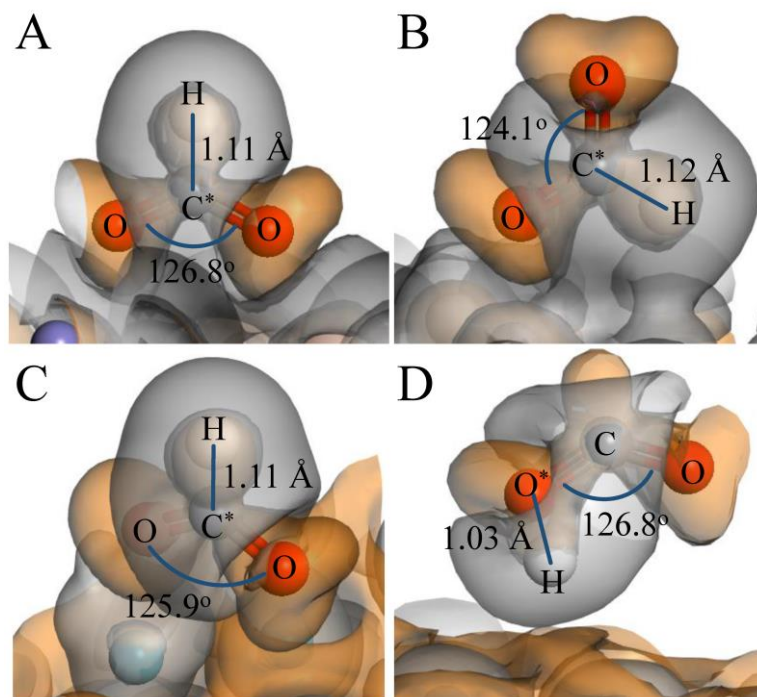

**Figure S5.** Deformation charge density for free adsorption of the activated CO<sub>2</sub> molecule on the H-assisted (A) Fe(111), (B) Ni(111), (C) Ru(0001) and (D) Pt(111).

**Table S1**

Construction information for Fe, Ni, Ru and Pt bulk metal and supercell after optimization.

| Transition metal                | Fe                                    | Ni                                    | Ru                                                  | Pt                                    |
|---------------------------------|---------------------------------------|---------------------------------------|-----------------------------------------------------|---------------------------------------|
| Supercell                       | Fe(111)                               | Ni(111)                               | Ru(0001)                                            | Pt(111)                               |
| Supercell size                  | $(2 \times 2 \times 6)$               | $(3 \times 3 \times 4)$               | $(3 \times 3 \times 5)$                             | $(3 \times 3 \times 5)$               |
| Vacuum space                    | 20 Å                                  | 20 Å                                  | 20 Å                                                | 20 Å                                  |
| Atomic number                   | 24                                    | 36                                    | 45                                                  | 45                                    |
| Lattice parameter of bulk metal | $a = 2.8664$ Å                        | $a = 3.5240$ Å                        | $a = 2.7058$ Å<br>$c = 4.2816$ Å                    | $a = 3.9239$ Å                        |
| Lattice parameter of supercell  | $a = b = 8.1074$ Å<br>$c = 24.1373$ Å | $a = b = 7.4755$ Å<br>$c = 26.1037$ Å | $a = 8.1174$ Å<br>$b = 8.1174$ Å<br>$c = 28.5632$ Å | $a = b = 8.3238$ Å<br>$c = 29.0619$ Å |
